# Supplementary material for: Air Quality Changes during the COVID-19 Lockdown in an Industrial City in North China: Post-Pandemic Proposals for Air Quality Improvement
Source: MDPI journal article supplement (doi:10.3390/su141811531), 2022-09-14
Supplement: s1 [file s1]

Archive with 1 entries (1 files):
- sustainability-1823696-supplementary.pdf
