# Supplementary material for: Air Quality Changes during the COVID-19 Lockdown in an Industrial City in North China: Post-Pandemic Proposals for Air Quality Improvement
Source: MDPI journal article supplement (doi:10.3390/su141811531), 2022-09-14
Supplement: s1 [file s1 › sustainability-1823696-supplementary.pdf]

**Table S1.** Information of the monitoring stations in the nine different functional areas in Handan.

| Functional areas  | Longitude/E° | Latitude/N° | Surrounding environment                                                                                                                    |
|-------------------|--------------|-------------|--------------------------------------------------------------------------------------------------------------------------------------------|
| Traffic area      | 114.43054    | 36.59076    | On the side of Hangang Road; there is a park nearby                                                                                        |
| Industrial area   | 114.46941    | 36.78076    | There are 5 industrial-related factories and companies around                                                                              |
| Commercial area   | 114.48085    | 36.77537    | There are trading buildings, department stores, Century Plaza, restaurants, hardware stores, electrical and kitchenware stores around      |
| Construction site | 114.20056    | 36.65726    | The construction site of the Handan Preschool Teachers College project                                                                     |
| Residential area  | 114.78531    | 36.56001    | Surrounded by residential buildings, cultural squares                                                                                      |
| Township          | 114.46212    | 36.76813    | Surrounded by communities and small towns                                                                                                  |
| Enterprise area   | 114.41075    | 36.60930    | There are companies, a new material industrial park, technical transformation department of iron and steel group corporation, Futong Group |
| Scenic area       | 114.48466    | 36.61594    | Community, school, barbecue restaurant, hotel                                                                                              |
| Village           | 114.16723    | 36.71245    | Villagers' living area                                                                                                                     |

**Table S2.** The changes (%) in air pollutants at different functional areas in Handan during COVID-19 lockdown period (Stage III) compared with the pre-COVID-19 period (Stage I).

| Functional areas  | PM <sub>2.5-10</sub> | PM <sub>2.5</sub> | SO <sub>2</sub> | NO <sub>2</sub> | CO    | O <sub>3</sub> |
|-------------------|----------------------|-------------------|-----------------|-----------------|-------|----------------|
| Traffic area      | -34.7                | -45.4             | -30.5           | -70.0           | -34.8 | 152.8          |
| Industrial area   | -54.8                | -48.3             | 80.6            | -19.0           | -26.8 | 14.7           |
| Commercial area   | -63.7                | -51.5             | -18.6           | -5.3            | -33.0 | 202.3          |
| Construction site | -31.9                | -41.8             | -9.2            | -48.0           | -35.1 | 167.2          |
| Residential area  | -56.0                | -44.9             | -48.7           | -64.9           | -44.1 | 82.8           |
| Township          | -62.4                | -50.7             | 18.1            | 9.7             | -33.4 | 242.0          |
| Enterprise area   | -43.8                | -46.2             | 15.5            | -58.4           | -27.2 | 189.3          |
| Scenic area       | -52.7                | -40.6             | -8.6            | -63.9           | -31.2 | 194.4          |
| Village           | -32.4                | -42.2             | 3.4             | -48.2           | -32.8 | 163.2          |
